# Supplementary material for: Climate change threatens archaeologically significant ice patches: insights into their age, internal structure, mass balance and climate sensitivity
Source: Copernicus journal article supplement (doi:10.5194/tc-11-17-2017), 2017-01-02
Supplement: Supplementary file 1 [file tc-11-17-2017-supplement.zip]

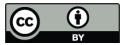

## *Supplement of*

# **Climate change threatens archaeologically significant ice patches: insights into their age, internal structure, mass balance and climate sensitivity**

**Rune Strand Ødegård et al.**

*Correspondence to:* Rune Strand Ødegård ([rune.oedegaard@ntnu.no](mailto:rune.oedegaard@ntnu.no))

- [tc-11-17-2017-supplement-title-page.pdf](#)
- [TC\\_data\\_table\\_accumulation\\_Measurements.txt](#)

The copyright of individual parts of the supplement might differ from the CC-BY 3.0 licence.
