# Supplementary material for: Climate change threatens archaeologically significant ice patches: insights into their age, internal structure, mass balance and climate sensitivity
Source: Copernicus journal article supplement (doi:10.5194/tc-11-17-2017), 2017-01-02
Supplement: Supplementary file 2 [file tc-11-17-2017-supplement.zip]

Archive with 2 entries (2 files):
- tc-11-17-2017-supplement-title-page.pdf
- TC_data_table_accumulation_Measurements.txt
